# Supplementary material for: Digitizing Medicines for Remote Capture of Oral Medication Adherence Using Co‐encapsulation
Source: PubMed Central journal article supplement — Clin Pharmacol Ther. 2017 Sep 19;103(3):502–10. doi: 10.1002/cpt.760 (PMC5836848; doi:10.1002/cpt.760), 2017-09-19
Supplement: CPT-103-502-s003.pdf [file CPT-103-502-s003.pdf]

Supplementary Table 2: Capsule size and design specifications for CoE medications used in the comparative dissolution studies.

| Drug         | Strength (mg) | Capsule Size | Capsule color    |
|--------------|---------------|--------------|------------------|
| Rifinah      | 150/300       | 00EL         | Opaque white     |
| Amlodipine   | 5             | 0            | 7568 Dark Blue   |
| Metformin    | 500           | DBAA<br>EL   | 3979 Gray        |
| Lisinopril   | 40            | 0            | 0620 Aqua Blue   |
| Atorvastatin | 20            | 0            | 4312 Pink        |
| Losartan     | 100           | DBAAel       | 1778 Powder blue |
| Glipizide IR | 5             | 00           | 5081 Yellow      |
