# Supplementary material for: Digitizing Medicines for Remote Capture of Oral Medication Adherence Using Co‐encapsulation
Source: PubMed Central journal article supplement — Clin Pharmacol Ther. 2017 Sep 19;103(3):502–10. doi: 10.1002/cpt.760 (PMC5836848; doi:10.1002/cpt.760), 2017-09-19
Supplement: CPT-103-502-s005.pdf [file CPT-103-502-s005.pdf]

Supplementary Table 3: Dissolution buffers and volume required, USP apparatus (baskets or paddles), rotational speed, analysis method for each co-encapsulated medicine tested.

| Drug name                                                     | USP apparatus & Speed | Dissolution Buffer, Volume (mls) & Temp          | Sampling times             | Analysis Method                 |
|---------------------------------------------------------------|-----------------------|--------------------------------------------------|----------------------------|---------------------------------|
| Rifinah<br>300/150mg<br>(Sanofi Aventis ,<br>Brindisi, Italy) | I @ 100rpm            | 0.1 N HCl, 900                                   | 10,15,30,45,60, 90,<br>120 | UV 475 nm                       |
| Amlodipine<br>Besylate 5mg<br>(Green Stone, NJ,<br>USA)       | II @ 75rpm            | 0.01N HCl, 500                                   | 10,15,30, 45               | 365 nm (due to<br>blue capsule) |
| Metformin HCl<br>500mg (Teva, USA)                            | II @ 50rpm            | Phosphate<br>buffer PH 6.8,<br>1000              | 10,15, 20, 30, 35          | UV vis                          |
| Lisinopril (Sandoz,<br>NJ, USA)                               | II @ 50rpm            | 0.1N HCl, 1000                                   | 10,15,20,30,45             | UV vis                          |
| Hydrochlorthiazide<br>25mg (Heritage,<br>NJ, USA)             | II @ 100rpm           | 0.1N HCL<br>900mls                               | 15, 30, 45, 60, and<br>75  | UV vis                          |
| Losartan 100mg<br>(TevaUSA, PN,<br>USA)                       | II @ 50rpm            | purified water,<br>900mls                        | 10, 15, 20, 30, 45         | UV vis                          |
| Glipizide 5mg<br>(Apotex, Toronto,<br>Canada)                 | II @ 50rpm            | Simulated<br>gastric intestinal<br>fluid, 900mls | 10, 20, 30, 45, 60         | UV vis                          |
| Atorvastatin                                                  | II @ 75rpm            | 0.05M<br>Phosphate<br>buffer pH 6.8<br>900mls;   | 5,10, 15, 30 and<br>45;    | HPLC                            |
