# Supplementary material for: Digitizing Medicines for Remote Capture of Oral Medication Adherence Using Co‐encapsulation
Source: PubMed Central journal article supplement — Clin Pharmacol Ther. 2017 Sep 19;103(3):502–10. doi: 10.1002/cpt.760 (PMC5836848; doi:10.1002/cpt.760), 2017-09-19
Supplement: CPT-103-502-s007.pdf [file CPT-103-502-s007.pdf]

**From:** Naunihal Virdi <[NVirdi@proteus.com](mailto:NVirdi@proteus.com)>  
**Date:** 9 March 2017 at 9:59:08 am GMT-8  
**To:** "Browne, Sara" <[shbrowne@ucsd.edu](mailto:shbrowne@ucsd.edu)>  
**Cc:** George Savage <[GSavage@proteus.com](mailto:GSavage@proteus.com)>  
**Subject:** **Authorization to use image in publication**

Dear Sara,

This email is in reference to allowing a Proteus image to be used within your manuscript, "Digitizing Medicines for precision remote capture of oral medication adherence," that was submitted to Clinical Pharmacology and Therapeutics. As you know we are fully supportive of the journal publishing Figure 1B, "Overview of the DHFS showing the information flow of ingestion and physiological data associated with DHFS use to both the patient and provider (figure courtesy of Proteus Digital Health, Redwood City, CA)."

We will grant permission to use the image in the final publication and will request the journal sign our, "**MEDIA ASSETS LICENSE & RELEASE**" form prior to publication.

Kind Regards,

**Naunihal S. Virdi, MD, MBA, FACP**  
Head of Medical Science  
T: 650-637-6207 M: 415-828-5009 F: 650-632-4093

**Proteus Digital Health, Inc.**  
2600 Bridge Parkway, Suite 101 Redwood City, CA 94065  
[proteusdigitalhealth.com](http://proteusdigitalhealth.com)  
[We're Hiring!](#)

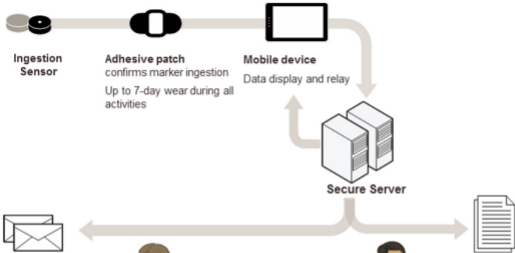

Patient reminders

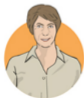

Patient

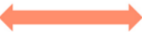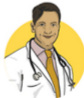

Provider

Provider e-reports

\*E-Reports:  
Pattern & regularity of medicines use  
Circadian pattern of rest & activity  
Daily step count  
Heart rate
