# Supplementary material for: Digitizing Medicines for Remote Capture of Oral Medication Adherence Using Co‐encapsulation
Source: PubMed Central journal article supplement — Clin Pharmacol Ther. 2017 Sep 19;103(3):502–10. doi: 10.1002/cpt.760 (PMC5836848; doi:10.1002/cpt.760), 2017-09-19
Supplement: CPT-103-502-s008.pdf [file CPT-103-502-s008.pdf]

**From:** Jeffrey Lamont Brown [[jb@tallgrasspictures.com](mailto:jb@tallgrasspictures.com)]  
**Sent:** Monday, March 06, 2017 6:30 PM  
**To:** Browne, Sara  
**Subject:** Re: Permission to use TallGrass Photo

Hi Sara,  
Yes! Feel free to use the images in perpetuity.  
Regards,  
Jeffrey

**Jeffrey Lamont Brown**  
Managing Director  
619.227.2701  
[jb@tallgrasspictures.com](mailto:jb@tallgrasspictures.com)

**Tallgrass Pictures LLC**  
710 13th Street #300  
San Diego, California 92101

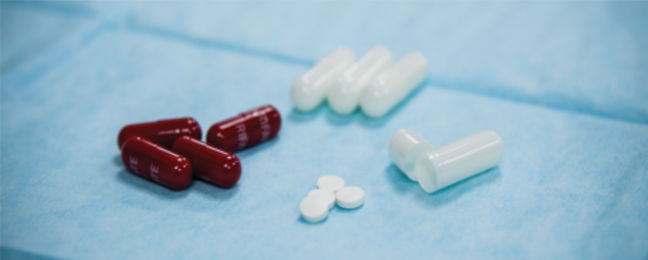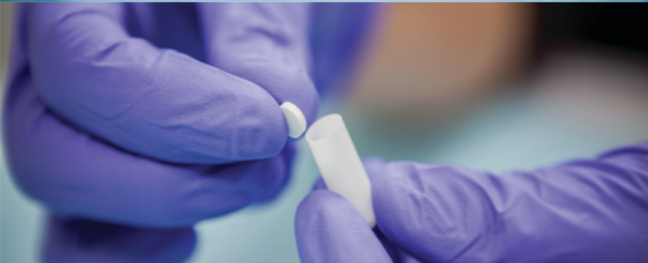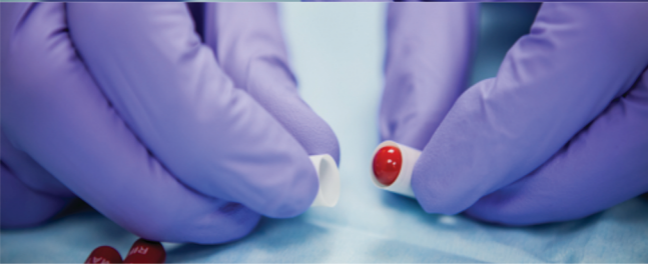



proteus  
DIGITAL HEALTH
