# Supplementary figures and images for: Digitizing Medicines for Remote Capture of Oral Medication Adherence Using Co‐encapsulation
Source: PubMed Central journal article supplement — Clin Pharmacol Ther. 2017 Sep 19;103(3):502–10. doi: 10.1002/cpt.760 (PMC5836848; doi:10.1002/cpt.760), 2017-09-19

# Supplemental Figure 1

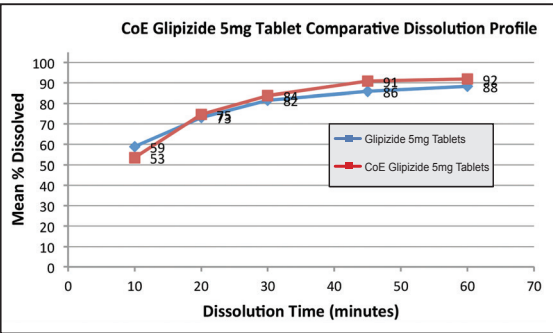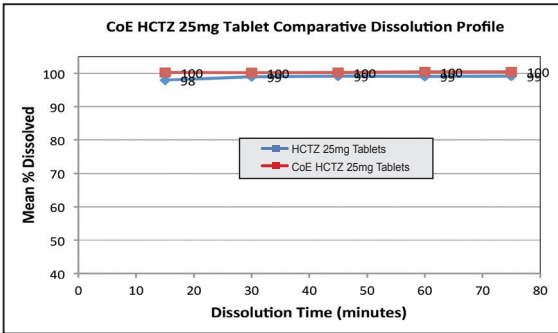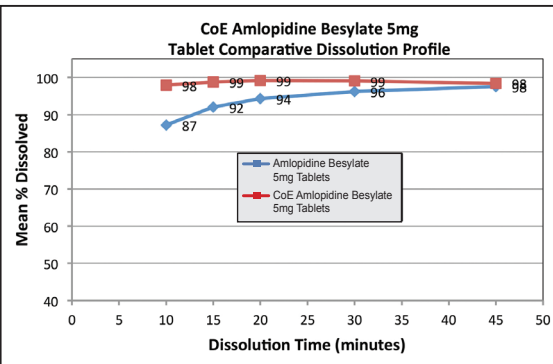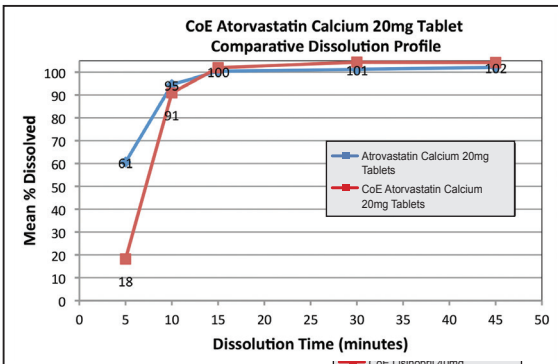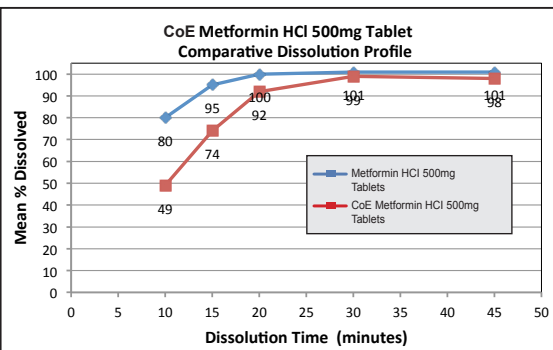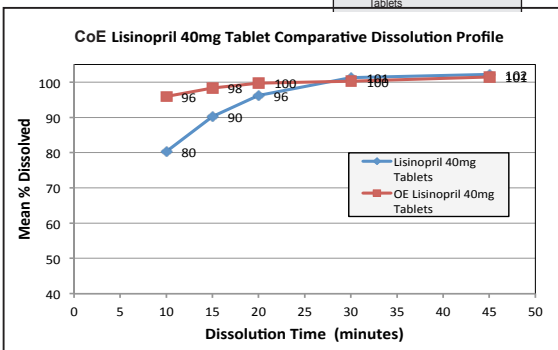

Supplement: CPT-103-502-s001.pdf [file CPT-103-502-s001.pdf]
